# Supplementary material for: SMM behaviour and magnetocaloric effect in heterometallic 3d–4f coordination clusters with high azide : metal ratios
Source: Royal Society of Chemistry journal article supplement (doi:10.1039/c7dt03149a), 2017-01-01
Supplement: c7dt03149a1.pdf [file c7dt03149a1.pdf]

## SMM Behaviour and Magnetocaloric Effect in Heterometallic 3d-4f Coordination Clusters with High Azide: Metal Ratios

Sebastian F. M. Schmidt,<sup>a</sup> Marcel P. Merkel,<sup>d</sup> George E. Kostakis,<sup>b</sup> Gernot Buth,<sup>c</sup> Christopher E. Anson<sup>a</sup>  
and Annie K. Powell<sup>a,d</sup>

### Experimental section

#### General Procedures.

Unless otherwise stated, all reagents were obtained from commercial sources and were used as received without further purification. The synthesis of complex **6** has been previously described.<sup>[32]</sup> All reactions were carried out under aerobic conditions. Elemental analyses (CHN) were performed using an Elementar Vario EL Analyzer. FTIR spectra were measured as KBr pellets over 4000-400 cm<sup>-1</sup> on a Perkin Elmer *Spectrum One* spectrometer. *Caution! Although no such tendency was observed during the present work, azide salts are potentially explosive and should be handled with care and in small quantities.*

#### Synthesis of Azidometallates

The synthesis of homoleptic azidometallates often involves the use of silverazide in combination with metal halogenides or metal fluorides in combination with trimethylsilylazides. We developed an easier and quicker approach to synthesise the desired azidometallates in high yields. It involves the use of metalchlorides with sodium azide and a bulky cation in a two phasic system of water and dichloromethane. *Caution! Mixtures of sodium azide with dichloromethane and a phase transfer reagent can contain diazidomethane which is very explosive. These reaction conditions should be maintained only shortly and the mixture should be handled with care and in small quantities.* It is possible to obtain crystalline products in this way (**3**). But we found that the desired heterometallic products in this work can only be obtained with tetrabutyl ammonium cations. The corresponding azidometallates of iron and manganese are oils in this case. Their elemental analysis is pointing to Fe(N<sub>3</sub>)<sub>5</sub><sup>2-</sup> and Mn(N<sub>3</sub>)<sub>6</sub><sup>3-</sup> anions.

#### Synthesis of [P(Ph)<sub>4</sub>]<sub>2</sub>[Fe(N<sub>3</sub>)<sub>5</sub>] **3**

1 mmol of FeCl<sub>3</sub>·6H<sub>2</sub>O is dissolved in 2 mL of water. 2 mmol of tetraphenylphosphonium bromide and 5 mmol of NaN<sub>3</sub> are dissolved in water and layered with 10 ml of dichloromethane. Under vigorous stirring the solution of the metal chloride is added. After one minute the organic layer is separated, dried over calcium chloride and evaporated under ambient conditions to obtain the deep red product. Yield: 73% relative to FeCl<sub>3</sub>·6H<sub>2</sub>O. *Anal.* calculated C 61.02, H 4.27, N 22.24; found: C 61.13, H 4.346, N 22.24 IR (KBr) /cm<sup>-1</sup>: 3422(br), 2042(s), 1435(m), 1327(m), 1105(s), 995(m), 759(m), 523(vs)

#### Synthesis of [TBA]<sub>2</sub>[Fe(N<sub>3</sub>)<sub>5</sub>]

The synthesis of this compound was carried out in the same way as **3**. Tetrabutylammonium bromide was used instead of tetraphenylphosphonium bromide. Yield of the deep red oil: 84 % relative to FeCl<sub>3</sub>·6H<sub>2</sub>O. *Anal.* Calculated C 51.19, H 9.67, N 31.71; found C 50.89, H 9.98, N 30.65 IR (KBr) /cm<sup>-1</sup>: 2962(s), 2037(s), 2011(m), 1471(s)

#### Synthesis of [TBA]<sub>2</sub>[Mn(N<sub>3</sub>)<sub>6</sub>]

The synthesis of this compound was carried out in the same way as **3**.  $\text{MnCl}_2 \cdot 6\text{H}_2\text{O}$  was used instead of  $\text{FeCl}_3 \cdot 6\text{H}_2\text{O}$ , tetrabutylammonium bromide was used instead of tetraphenylphosphonium bromide and the reaction time was increased to two hours to allow for the oxidation of manganese. Yield of the brown oil: 96 % relative to  $\text{MnCl}_2 \cdot 6\text{H}_2\text{O}$  *Anal.* Calculated C 55.73, H 10.52, N 28.43; found C 56.19, H 10.1, N 28.12 IR (KBr)  $/\text{cm}^{-1}$ : 2943(s), 2048(s), 1485(s)

## Synthesis of heterometallic compounds

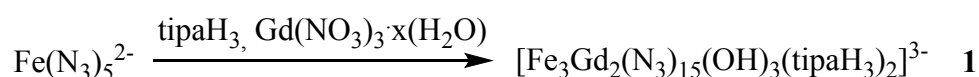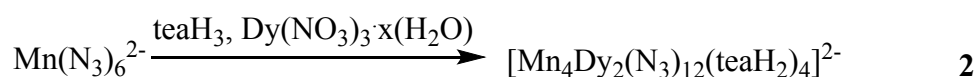

$\text{tipaH}_3$  = triisopropanolamine;  $\text{teaH}_3$  = triethanolamine;

### Synthesis of $(\text{TBA})_3[\text{Fe}_3\text{Gd}_2(\text{N}_3)_{15}(\text{OH})_3(\text{tipaH}_3)_2]$ **1**

1 mmol of  $\text{FeCl}_3 \cdot 6\text{H}_2\text{O}$  is dissolved in 2 mL of water. 2 mmol of tetrabutylammonium bromide and 5 mmol of  $\text{NaN}_3$  are dissolved in water and layered with 10 ml of dichloromethane. Under vigorous stirring the solution of the metal chloride is added. After one minute the organic layer is separated and dried over calcium chloride. The dichloromethane solution is then added dropwise to an ethanolic solution 1 mmol of triisopropanolamine and 0.5 mmol of  $\text{Gd}(\text{NO}_3)_3 \cdot x\text{H}_2\text{O}$ . Yield of dark red crystals: 7 % relative to  $\text{Gd}(\text{NO}_3)_3 \cdot x\text{H}_2\text{O}$ . *Anal.* Calculated C 34.78, H 6.78, N 30.81; found C 34.75, H 6.74, N 30.53 IR (KBr)  $/\text{cm}^{-1}$ : 3393 (bm), 2864 (s), 2095 (s), 2067 (s), 2054 (s), 1548 (s), 1418 (s), 1074 (s), 847 (s)

### Synthesis of $(\text{TBA})_2[\text{Mn}_4\text{Dy}_2(\text{N}_3)_{12}(\text{teaH}_2)_4]$ **2**

1 mmol of  $\text{MnCl}_2 \cdot 6\text{H}_2\text{O}$  is dissolved in 2 mL of water. 2 mmol of tetrabutylammonium bromide and 5 mmol of  $\text{NaN}_3$  are dissolved in water and layered with 10 ml of dichloromethane. Under vigorous stirring the solution of the metal chloride is added. After two hours the organic layer is separated and dried over calcium chloride. The dichloromethane solution is then added dropwise to an ethanolic solution of 1 mmol of triethanolamine and 0.5 mmol of  $\text{Dy}(\text{NO}_3)_3 \cdot x\text{H}_2\text{O}$ . Yield of black crystals: 12 % relative to  $\text{Dy}(\text{NO}_3)_3 \cdot x\text{H}_2\text{O}$  *Anal.* Calculated C: 31.69; H: 5.89; N: 27.71; found C 31.62, H 5.86 N 27.74 IR (KBr)  $/\text{cm}^{-1}$ : 3391 (bm), 2845 (s), 2073 (s), 2023 (s), 1567 (s), 1386 (s), 694 (s)

## Crystallography

Data for **1** and **2** were measured at 150(2) K with a Bruker SMART Apex diffractometer on the SCD beamline at the ANKA synchrotron source, Karlsruhe Institute of Technology, using Si-monochromated radiation of wavelength 0.80039 Å. Data for **3** were collected at 223(2) K with a Stoe IPDS diffractometer using graphite-monochromated  $\text{Mo-K}\alpha$  radiation. Datasets were corrected for

polarisation and absorption effects. The crystal of **2** was found to be moderately twinned (minor component ca. 21%) by a 180 deg rotation about  $a^*$ . The data were integrated and corrected for absorption taking this twinning into account. Crystals of **3** were of poor quality, and no significant intensity could be measured for  $2\theta > 46.5^\circ$ ; the data were therefore truncated at this point. Since **3** is only a precursor complex, no attempt was made to re-collect data using the synchrotron source.

Structure solution by direct methods using SHELXS<sup>[x1]</sup> was followed by full-matrix least-squares refinement using SHELXL-2016<sup>[x2]</sup>, with anisotropic thermal parameters for all ordered non-H atoms. O-H distances were restrained to 0.88(4) Å; organic H-atoms were placed in calculated positions. For the structures of **1** and **2**, anomalous scattering factors  $f'$  and  $f''$  were calculated using the method of Brennan and Cowan<sup>[x3]</sup>, as implemented on [http://skuld.bmsc.washington.edu/scatter/AS\\_periodic.html](http://skuld.bmsc.washington.edu/scatter/AS_periodic.html).

Disorder in the n-butyl groups of the cations and in the lattice solvent was modelled using pairs of partial-occupancy isotropic atoms and geometrical similarity restraints as appropriate. In the structure of **1**, a lattice  $\text{CH}_2\text{Cl}_2$  and  $\text{C}_2\text{H}_5\text{OH}$  were mutually (and badly) disordered over an inversion centre. The contributions of these to the structure calculations was calculated using SQUEEZE<sup>[x4]</sup>, as implemented in PLATON<sup>[x5]</sup>. The atoms of these disordered ("SQUEEZEd") molecules are included in the SFAC/UNIT list. Structure factors in the refinement included these contributions from the .fab file.

Crystallographic data for the structures in this paper have been deposited with the Cambridge Crystallographic Data Centre as supplementary publication nos. CCDC 1559987-1559989. Copies of the data can be obtained, free of charge, from <https://summary.ccdc.cam.ac.uk/structure-summary-form>.

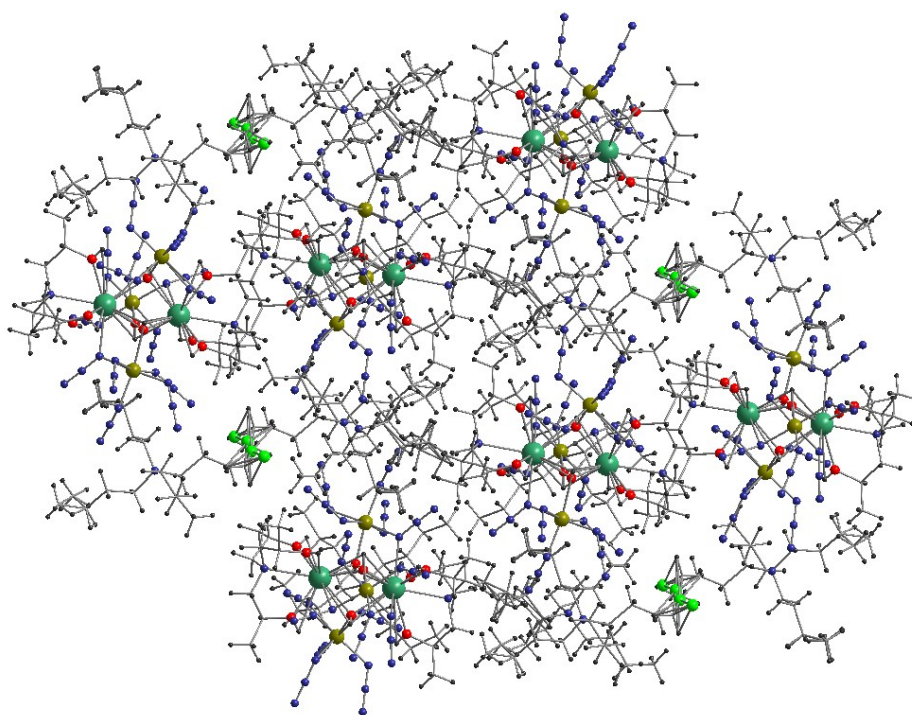

Figure S1 Packing diagram of the crystal structure of **1**

Table S1 Selected bond distances of **1**

| Atom1 | Atom2 | Distance [Å] | Atom1 | Atom2 | Distance [Å] |
|-------|-------|--------------|-------|-------|--------------|
| Gd1   | O6    | 2.4086(19)   | Fe1   | N61   | 1.990(3)     |
| Gd1   | O1    | 2.4217(17)   | Fe1   | N51   | 2.053(2)     |
| Gd1   | O4    | 2.4372(19)   | Fe1   | O1    | 2.0655(16)   |
| Gd1   | O2    | 2.4389(17)   | Fe1   | N11   | 2.085(2)     |
| Gd1   | O5    | 2.4435(17)   | Fe1   | N81   | 2.087(3)     |
| Gd1   | O3    | 2.4730(17)   | Fe1   | N71   | 2.111(3)     |
| Gd1   | N21   | 2.548(2)     | Fe2   | N101  | 2.030(2)     |
| Gd1   | N1    | 2.789(2)     | Fe2   | N91   | 2.044(2)     |
| Gd2   | O3    | 2.3975(17)   | Fe2   | N121  | 2.066(2)     |
| Gd2   | O8    | 2.4035(18)   | Fe2   | N111  | 2.078(2)     |
| Gd2   | O9    | 2.4380(18)   | Fe2   | O2    | 2.0865(16)   |
| Gd2   | O7    | 2.4498(19)   | Fe2   | N21   | 2.099(2)     |
| Gd2   | O2    | 2.4618(16)   | Fe3   | N151  | 1.993(2)     |
| Gd2   | O1    | 2.4876(17)   | Fe3   | N31   | 2.048(2)     |
| Gd2   | N11   | 2.526(2)     | Fe3   | N131  | 2.065(2)     |
| Gd2   | N41   | 2.597(2)     | Fe3   | N141  | 2.067(3)     |
| Gd2   | N2    | 2.744(2)     | Fe3   | O3    | 2.0766(18)   |
|       |       |              | Fe3   | N41   | 2.146(2)     |

Table S2 Selected bond angles of **1**

| Atom13 | Atom23 | Atom3 | Angle [°]  |
|--------|--------|-------|------------|
| Gd1    | O1     | Gd2   | 96.74(6)   |
| Gd1    | O2     | Gd2   | 96.98(6)   |
| Gd1    | O3     | Gd2   | 97.77(6)   |
| Fe1    | O1     | Gd2   | 108.83(7)  |
| Fe1    | O1     | Gd1   | 119.69(8)  |
| Fe2    | O2     | Gd2   | 124.68(8)  |
| Fe2    | O2     | Gd1   | 109.28(7)  |
| Fe3    | O3     | Gd2   | 112.33(7)  |
| Fe3    | O3     | Gd1   | 115.01(7)  |
| Fe1    | N11    | Gd2   | 106.80(8)  |
| Fe2    | N21    | Gd1   | 104.97(8)  |
| Fe3    | N31    | Gd1   | 101.99(10) |
| Fe3    | N41    | Gd2   | 102.94(8)  |

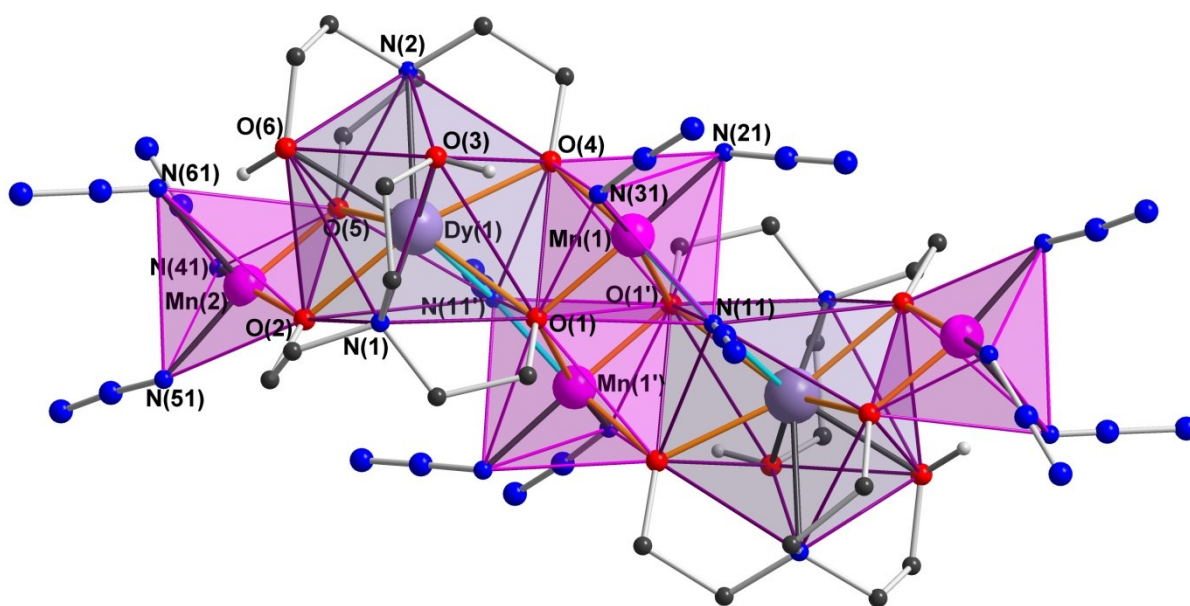

Figure S2: Structure of cluster anion in **2** showing coordination polyhedra.

Table S3 Selected bond distances of **2**

| Atom1 | Atom2 | Abstand [Å] | Atom1 | Atom2 | Abstand [Å] |
|-------|-------|-------------|-------|-------|-------------|
| Dy1   | O2    | 2.291(6)    | Mn1   | O4    | 1.923(5)    |
| Dy1   | O4    | 2.364(5)    | Mn1   | N21   | 1.946(7)    |
| Dy1   | O5    | 2.380(5)    | Mn1   | N11   | 1.986(6)    |
| Dy1   | O1    | 2.488(5)    | Mn1   | O1    | 1.998(5)    |
| Dy1   | O3    | 2.491(6)    | Mn1   | N31   | 2.187(7)    |
| Dy1   | O6    | 2.491(6)    | Mn1   | O1    | 2.353(5)    |
| Dy1   | N11   | 2.581(6)    | Mn2   | O5    | 1.895(5)    |
| Dy1   | N2    | 2.599(7)    | Mn2   | N41   | 1.943(7)    |
| Dy1   | N1    | 2.642(7)    | Mn2   | O2    | 1.950(6)    |
| Dy1   | Mn2   | 3.4577(13)  | Mn2   | N51   | 1.954(7)    |
| Dy1   | Mn1   | 3.5132(12)  | Mn2   | N61   | 2.256(10)   |

Table S4 Selected bond angles of **2**

| Atom1 | Atom2 | Atom3 | Winkel [°] |
|-------|-------|-------|------------|
| Mn1   | O1    | Dy1   | 102.6(2)   |
| Mn1   | O1    | Dy1   | 103.13(17) |
| Mn1   | O4    | Dy1   | 109.6(2)   |
| Mn1   | O1    | Mn1   | 98.56(18)  |
| Mn2   | O2    | Dy1   | 109.0(2)   |
| Mn2   | O5    | Dy1   | 107.4(2)   |
| Mn1   | N11   | Dy1   | 111.7(3)   |

Table S5 Crystallographic data of **1**, **2** and **3**

|                                                             | <b>1</b>                                                                                                          | <b>2</b>                                                                                         | <b>3</b>                                                         |
|-------------------------------------------------------------|-------------------------------------------------------------------------------------------------------------------|--------------------------------------------------------------------------------------------------|------------------------------------------------------------------|
| Sum formula                                                 | C <sub>68</sub> H <sub>158</sub> Cl <sub>2</sub> Fe <sub>3</sub> Gd <sub>2</sub> N <sub>50</sub> O <sub>9.5</sub> | C <sub>56</sub> H <sub>124</sub> Dy <sub>2</sub> Mn <sub>4</sub> N <sub>42</sub> O <sub>12</sub> | C <sub>48</sub> H <sub>40</sub> FeN <sub>15</sub> P <sub>2</sub> |
| FW [g/mol]                                                  | 2381.39                                                                                                           | 2122.73                                                                                          | 944.74                                                           |
| Temperature [K]                                             | 150(2)                                                                                                            | 150(2)                                                                                           | 223(2)                                                           |
| Crystal system                                              | triclinic                                                                                                         | monoclinic                                                                                       | Monoclinic                                                       |
| Space group                                                 | p $\bar{1}$                                                                                                       | P2 <sub>1</sub> /c                                                                               | C2/c                                                             |
| <i>a</i> [Å]                                                | 16.989(2)                                                                                                         | 17.178(4)                                                                                        | 11.7369(15)                                                      |
| <i>b</i> [Å]                                                | 17.111(2)                                                                                                         | 15.074(4)                                                                                        | 18.103(2)                                                        |
| <i>c</i> [Å]                                                | 22.479(3)                                                                                                         | 17.795(4)                                                                                        | 21.962(3)                                                        |
| $\alpha$ [°]                                                | 68.741(2)                                                                                                         | 90                                                                                               | 90                                                               |
| $\beta$ [°]                                                 | 80.570(2)                                                                                                         | 93.283(4)                                                                                        | 91.789(15)                                                       |
| $\gamma$ [°]                                                | 63.397(2)                                                                                                         | 90                                                                                               | 90                                                               |
| <i>V</i> [Å <sup>3</sup> ]                                  | 5445.3(13)                                                                                                        | 4600.3(18)                                                                                       | 4664.1(11)                                                       |
| <i>Z</i>                                                    | 2                                                                                                                 | 2                                                                                                | 4                                                                |
| $\rho$ [g/cm <sup>3</sup> ]                                 | 1.452                                                                                                             | 1.532                                                                                            | 1.345                                                            |
| $\mu$ [mm <sup>-1</sup> ]                                   | 2.319                                                                                                             | 3.028                                                                                            | 0.444                                                            |
| <i>F</i> (000)                                              | 2464                                                                                                              | 2164                                                                                             | 1956                                                             |
| <i>T</i> [K]                                                | 150(2)                                                                                                            | 150(2)                                                                                           | 223(2)                                                           |
| $\lambda$ [Å]                                               | 0.80039                                                                                                           | 0.80039                                                                                          | 0.71073                                                          |
| Data measured                                               | 104884                                                                                                            | 56288                                                                                            | 13012                                                            |
| <i>R</i> (int)                                              | 0.0468                                                                                                            | 0.0597                                                                                           | 0.1067                                                           |
| Independent data                                            | 23862                                                                                                             | 9750                                                                                             | 3249                                                             |
| Ind. Data with <i>I</i> > 2 $\sigma$ ( <i>I</i> )           | 20789                                                                                                             | 8350                                                                                             | 1990                                                             |
| Refined parameters                                          | 1225                                                                                                              | 528                                                                                              | 312                                                              |
| <i>S</i> (all data)                                         | 1.052                                                                                                             | 1.084                                                                                            | 0.918                                                            |
| <i>wR</i> <sub>2</sub> (all data)                           | 0.0755                                                                                                            | 0.1794                                                                                           | 0.1023                                                           |
| <i>R</i> <sub>1</sub> [ <i>I</i> > 2 $\sigma$ ( <i>I</i> )] | 0.0292                                                                                                            | 0.0705                                                                                           | 0.0441                                                           |
| Min/max electron density [e Å <sup>-3</sup> ]               | 1.4x/-1.16                                                                                                        | 2.47/-1.49                                                                                       | 0.19 / -0.37                                                     |
| CCDC                                                        | 1559987                                                                                                           | 1559988                                                                                          | 1559989                                                          |

## Magnetic measurements

Magnetic susceptibility data (2-300K) were collected on powdered polycrystalline samples on a Quantum Design MPMS-XL SQUID magnetometer under an applied magnetic field of 0.1 T. *Ac* measurements were performed in the 2-10K range using a 3.0 Oe *ac* field oscillation in 1-1500Hz range. Magnetization isotherms were collected at 2K between 0 and 5T. All data were corrected from the sample holder contribution and the diamagnetism of the samples estimated from Pascal's constants.<sup>36,37</sup>

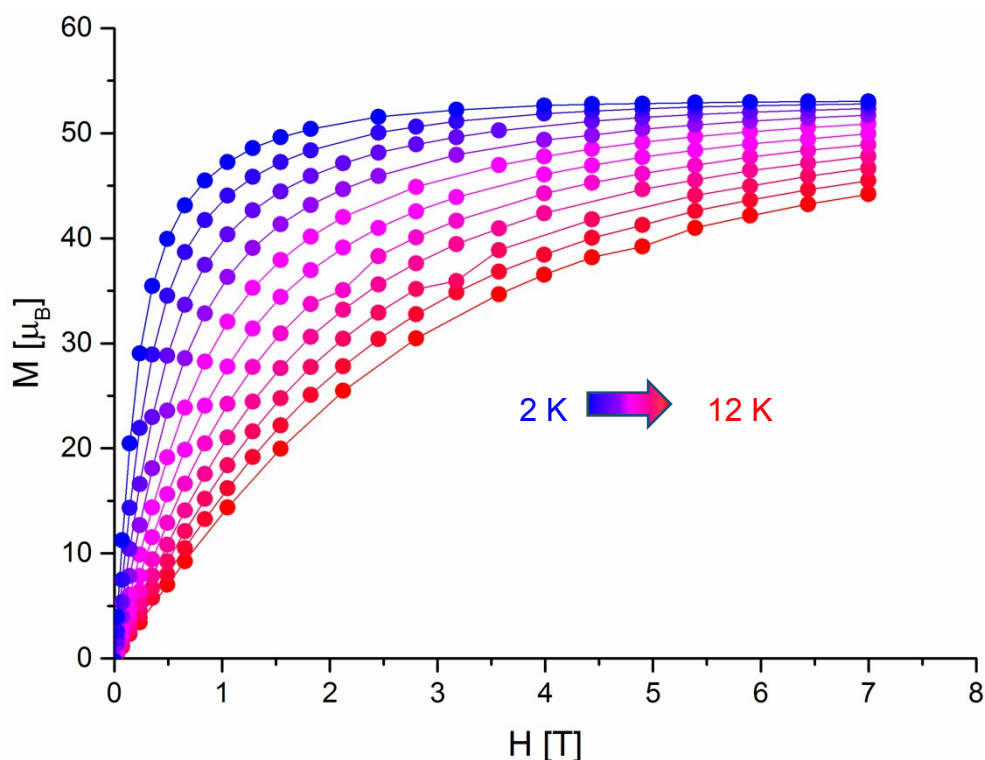

Figure S3 magnetisation in the dependence of the magnetic field of **1** in a temperature range of 2 to 12 K

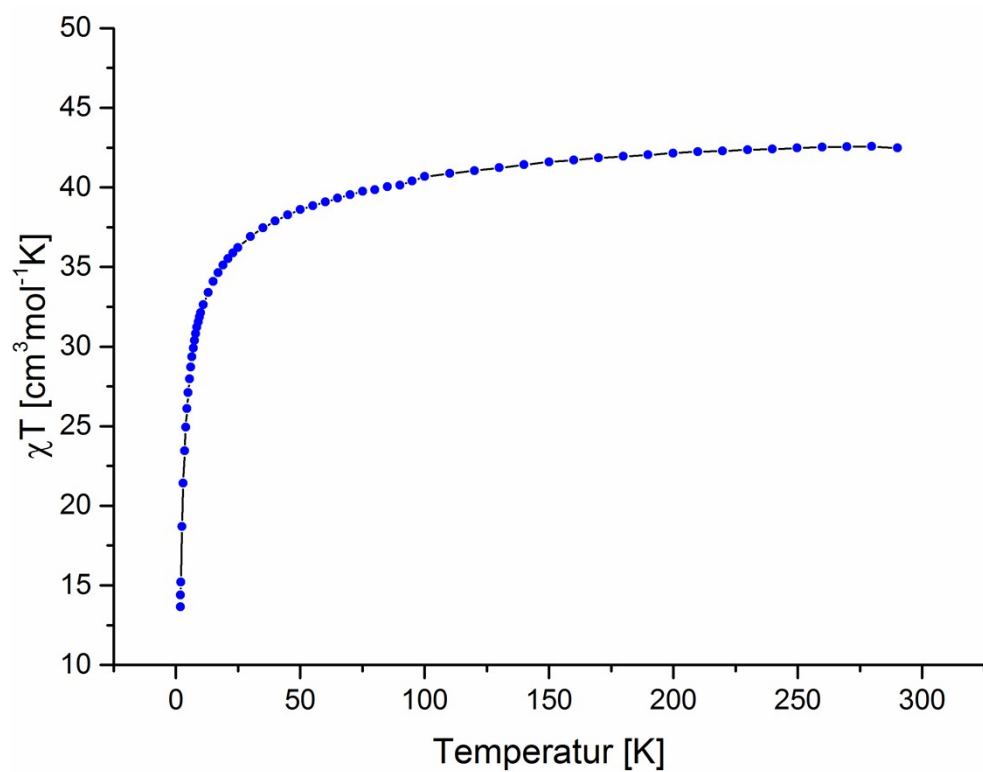

Figure S4  $\chi T$  vs  $T$  of **2** between 2 and 300 K and an applied field of 0.1 T

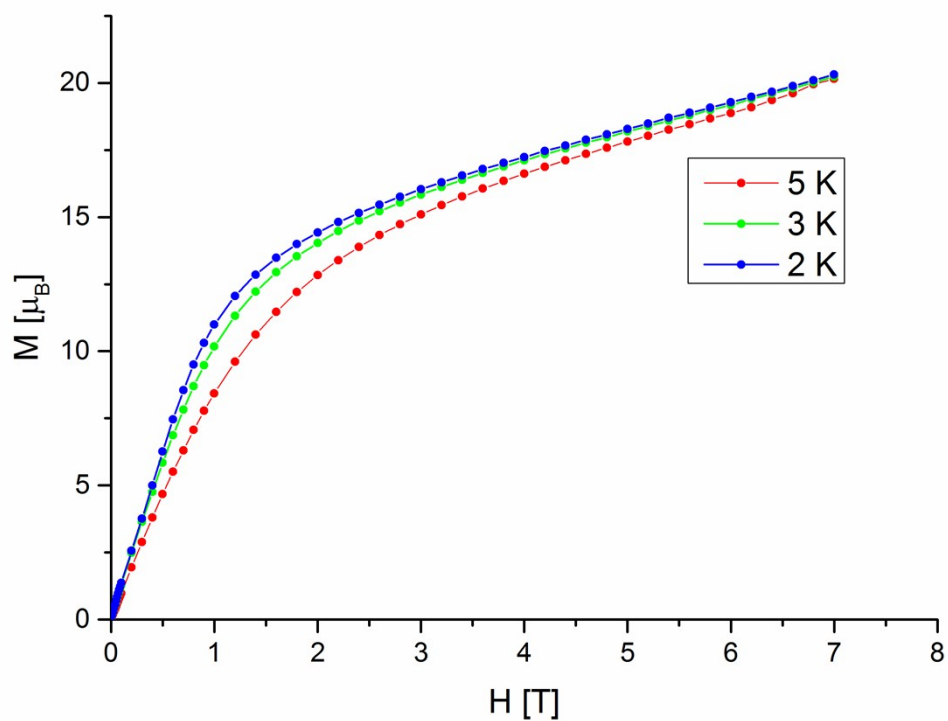

Figure S5 magnetisation in the dependence of the magnetic field of **2** in a temperature range of 3 to 5 K



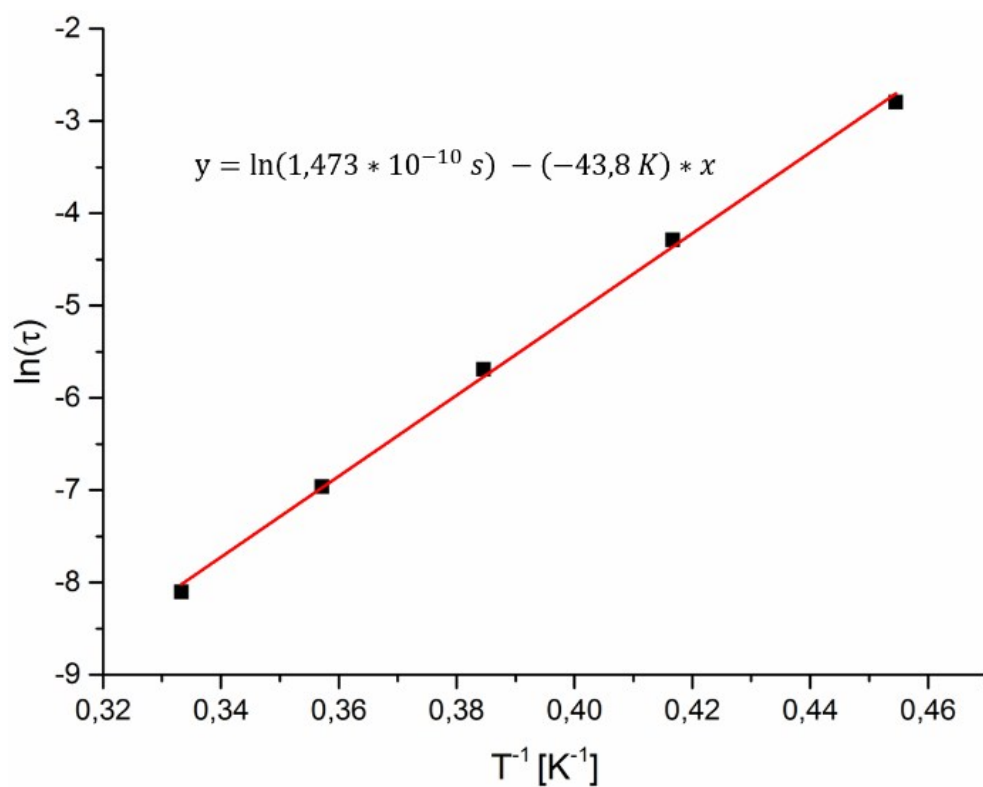

Figure S6 Arrhenius Plot of **2**

- [1] G.M. Sheldrick, *Acta Cryst.*, 2008, **A64**, 112-122
- [2] G.M. Sheldrick, *Acta Cryst.*, 2015, **C71**, 3-8
- [3] S Brennan and P.L. Cowan, *Rev. Sci. Instrum.*, 1992, **63**, 850
- [4] A. L. Spek, *Acta Cryst.*, 2015, **C71**, 9-18
- [5] A. L. Spek, *Acta Cryst.*, 2009, **D65**, 148-155
